# Supplementary material
Source: PubMed Central journal article supplement (PMC3593308)

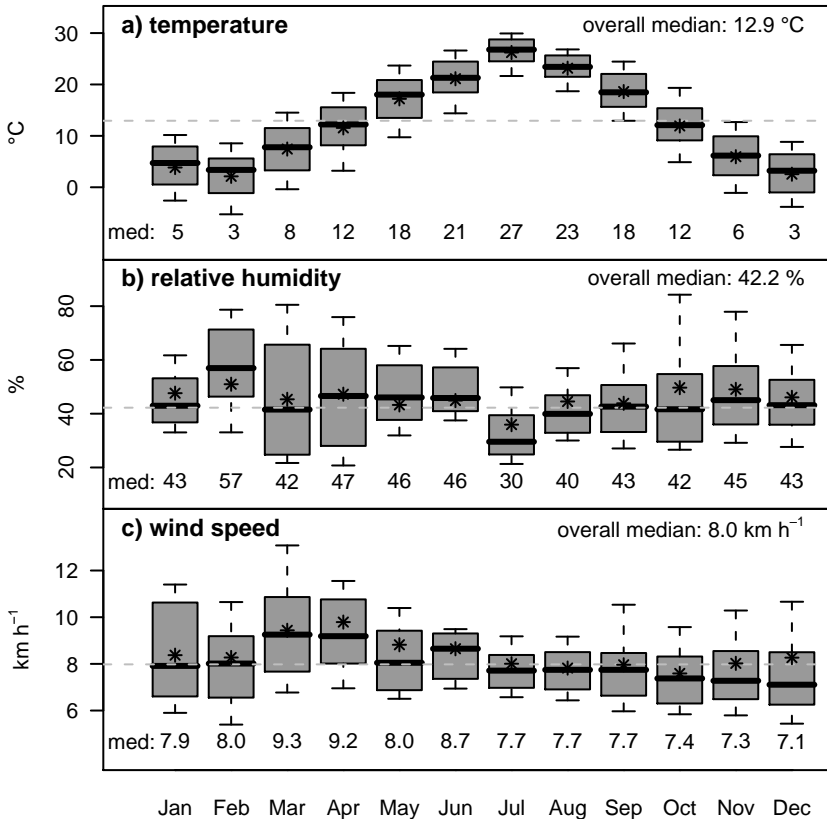

Supplement: NIHMS170612-supplement-01.pdf [file NIHMS170612-supplement-01.pdf]

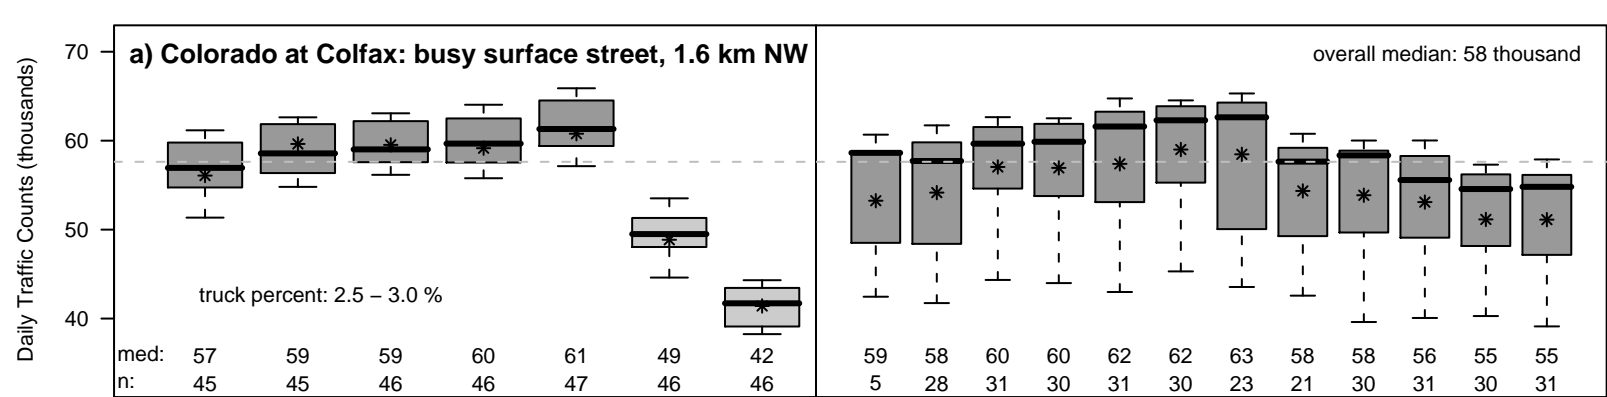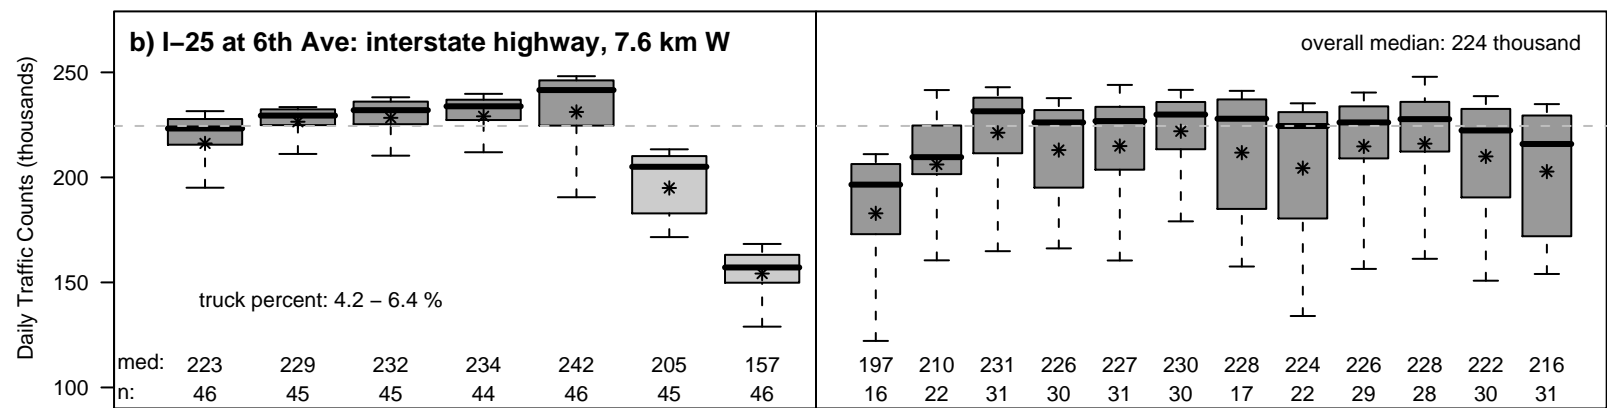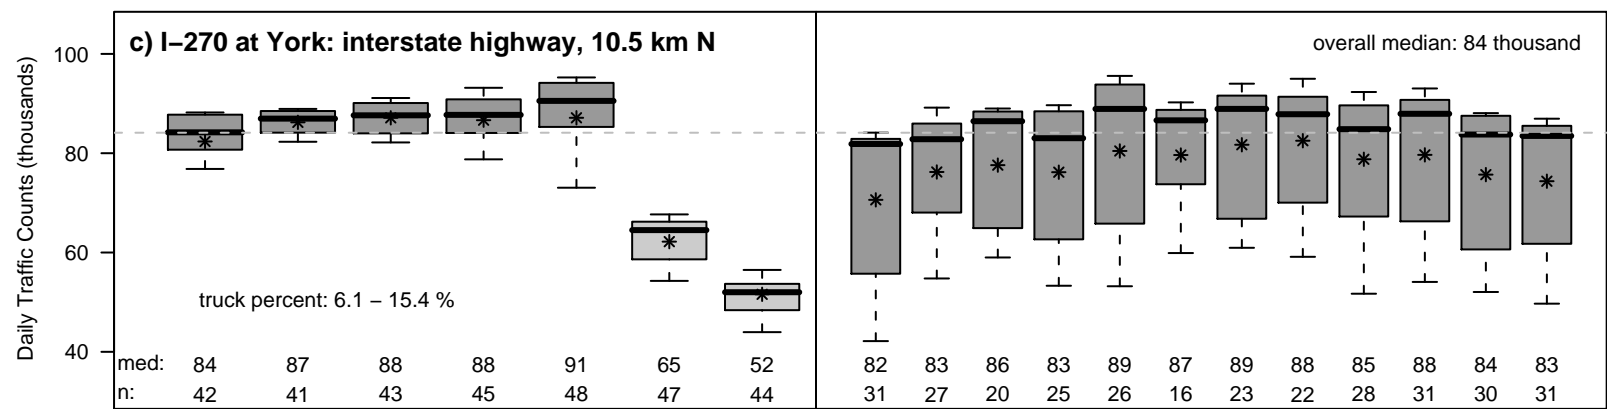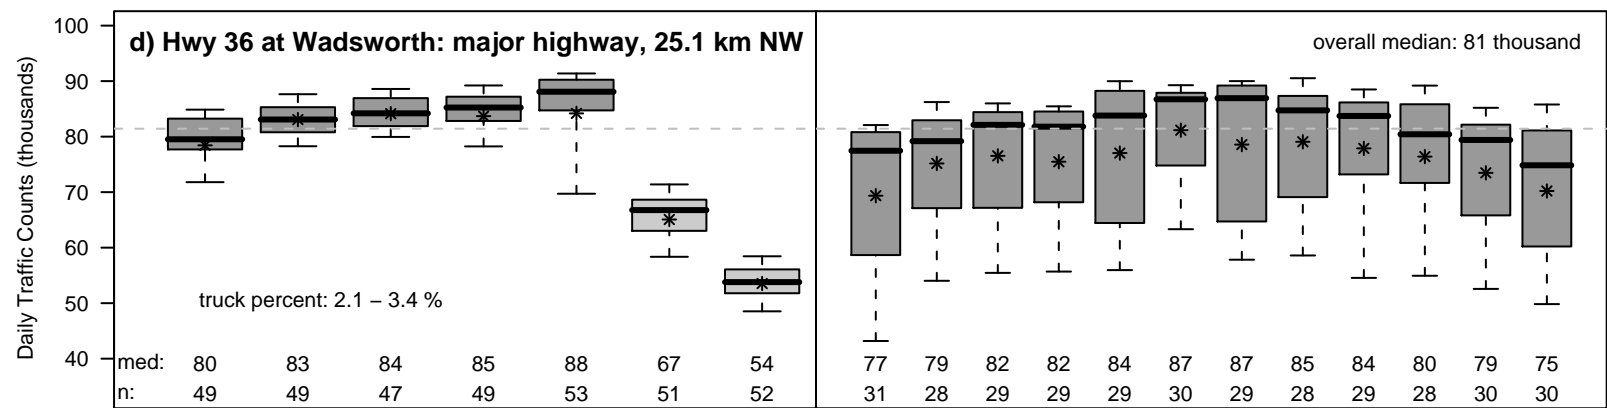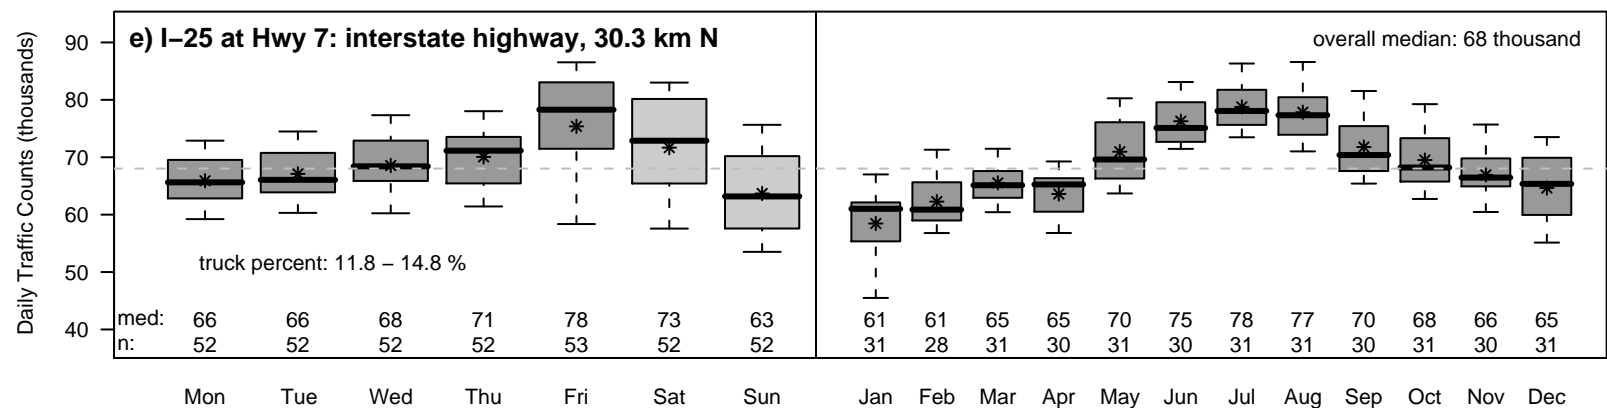

Mon Tue Wed Thu Fri Sat Sun Jan Feb Mar Apr May Jun Jul Aug Sep Oct Nov Dec

Supplement: NIHMS170612-supplement-02.pdf [file NIHMS170612-supplement-02.pdf]

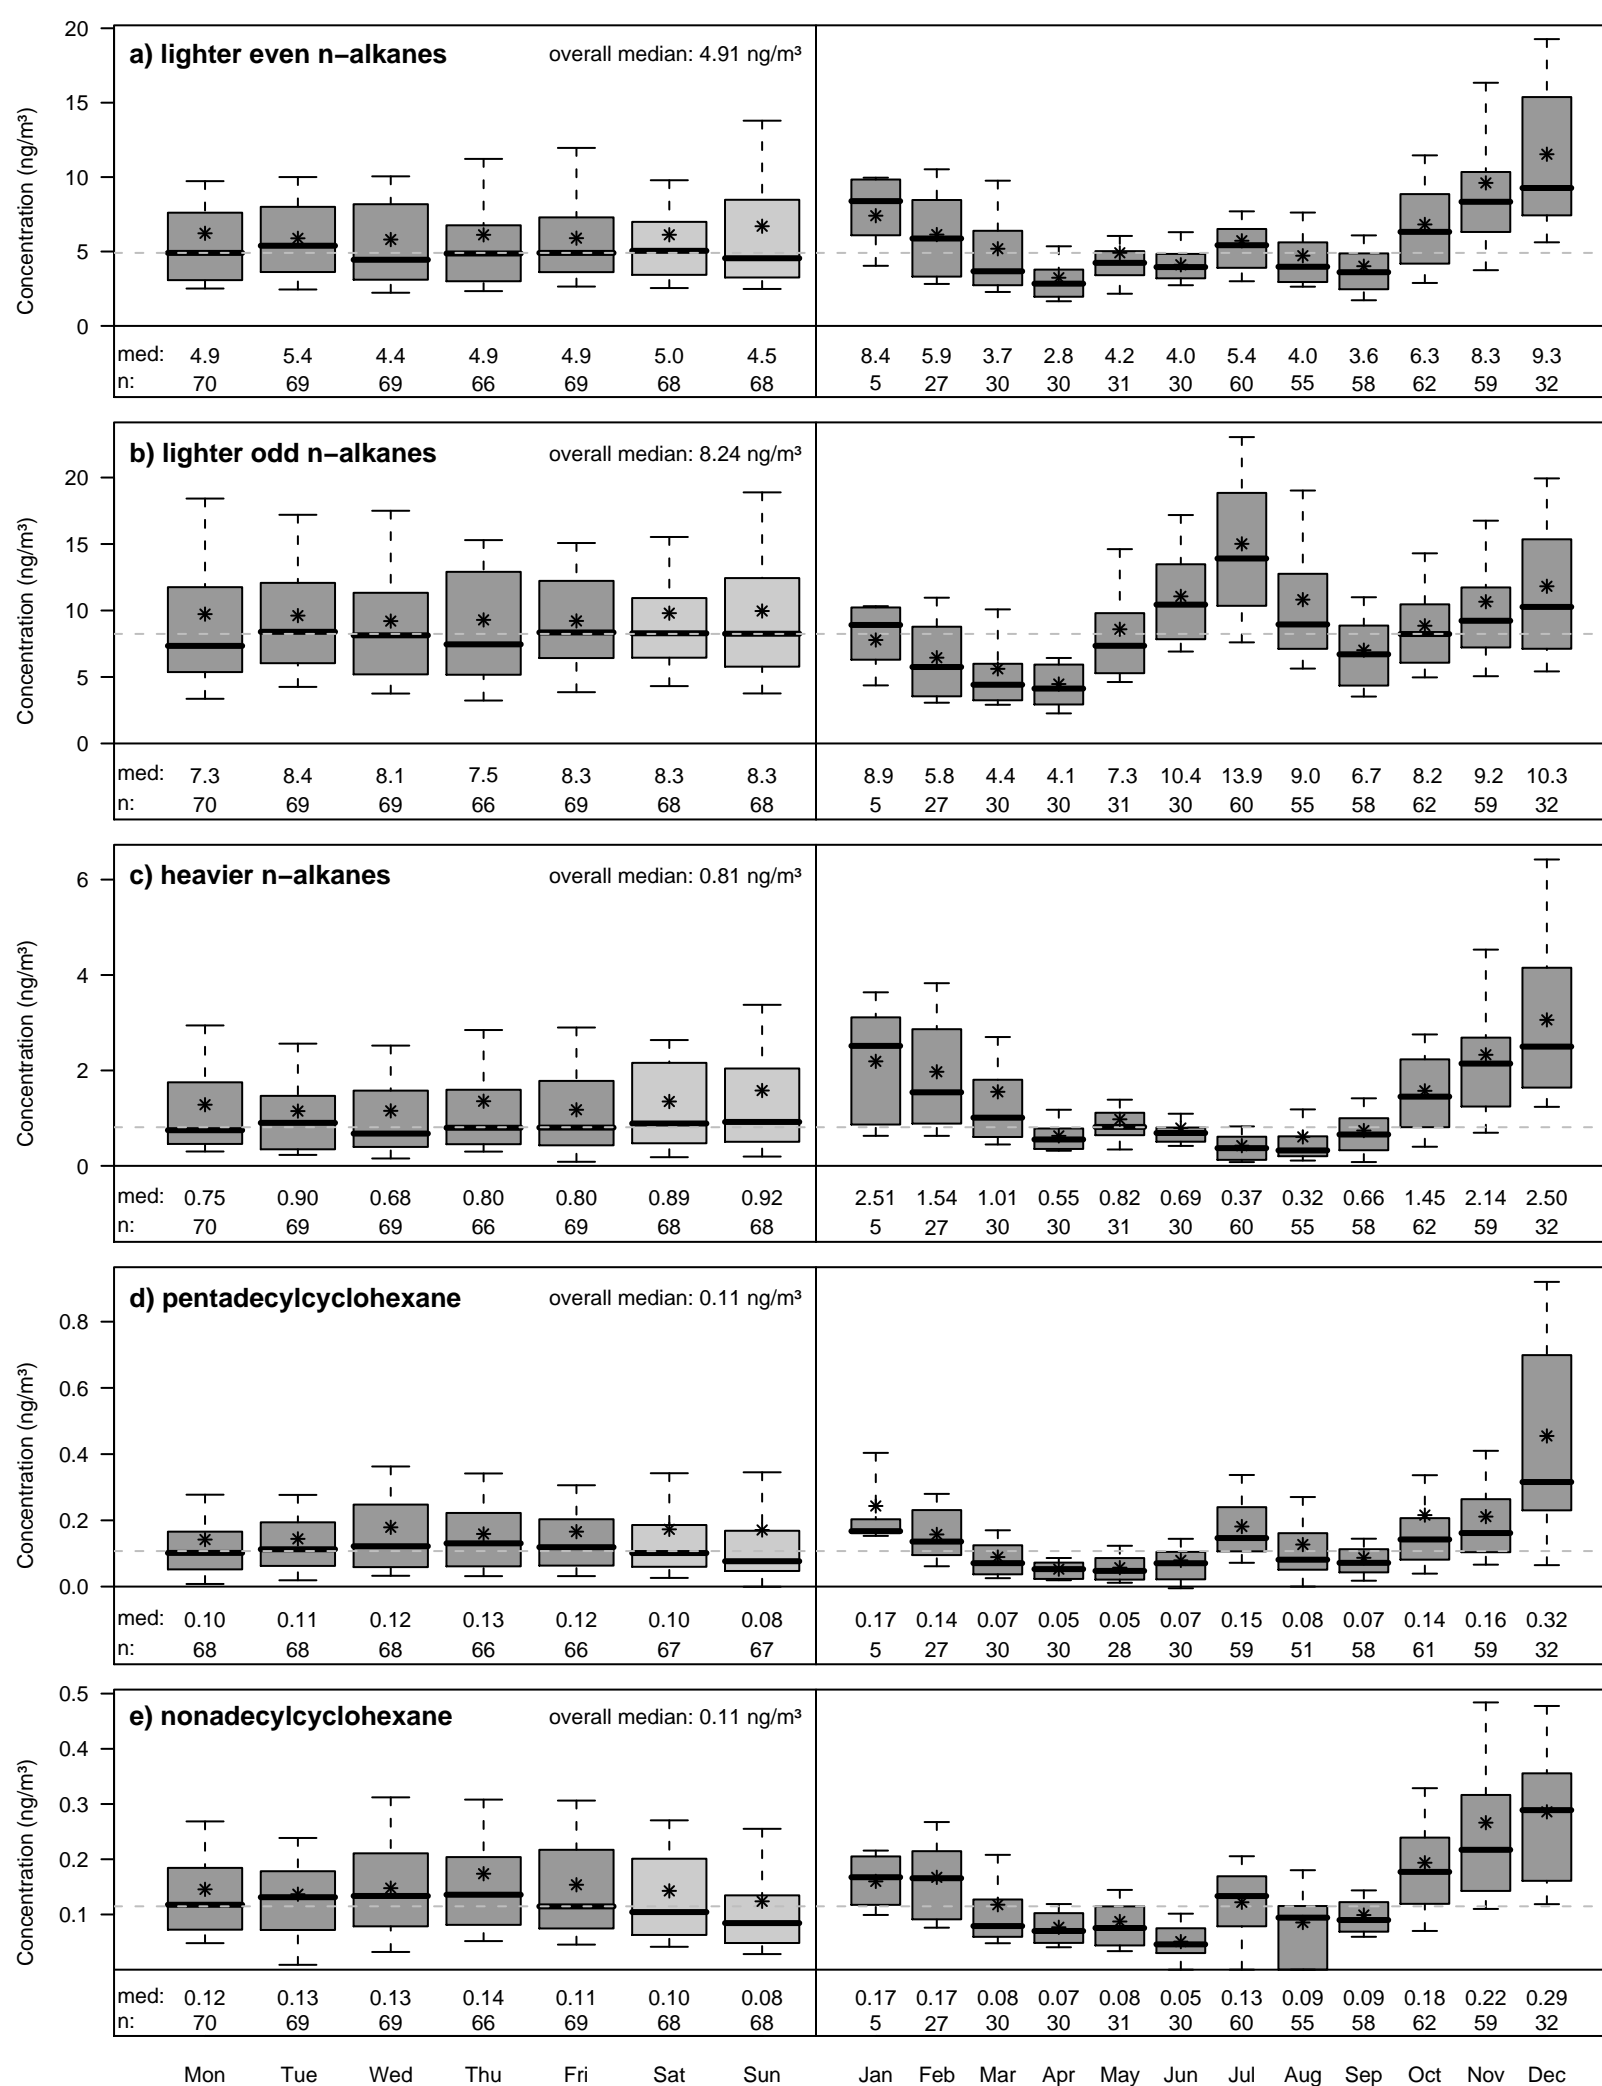

Supplement: NIHMS170612-supplement-03.pdf [file NIHMS170612-supplement-03.pdf]

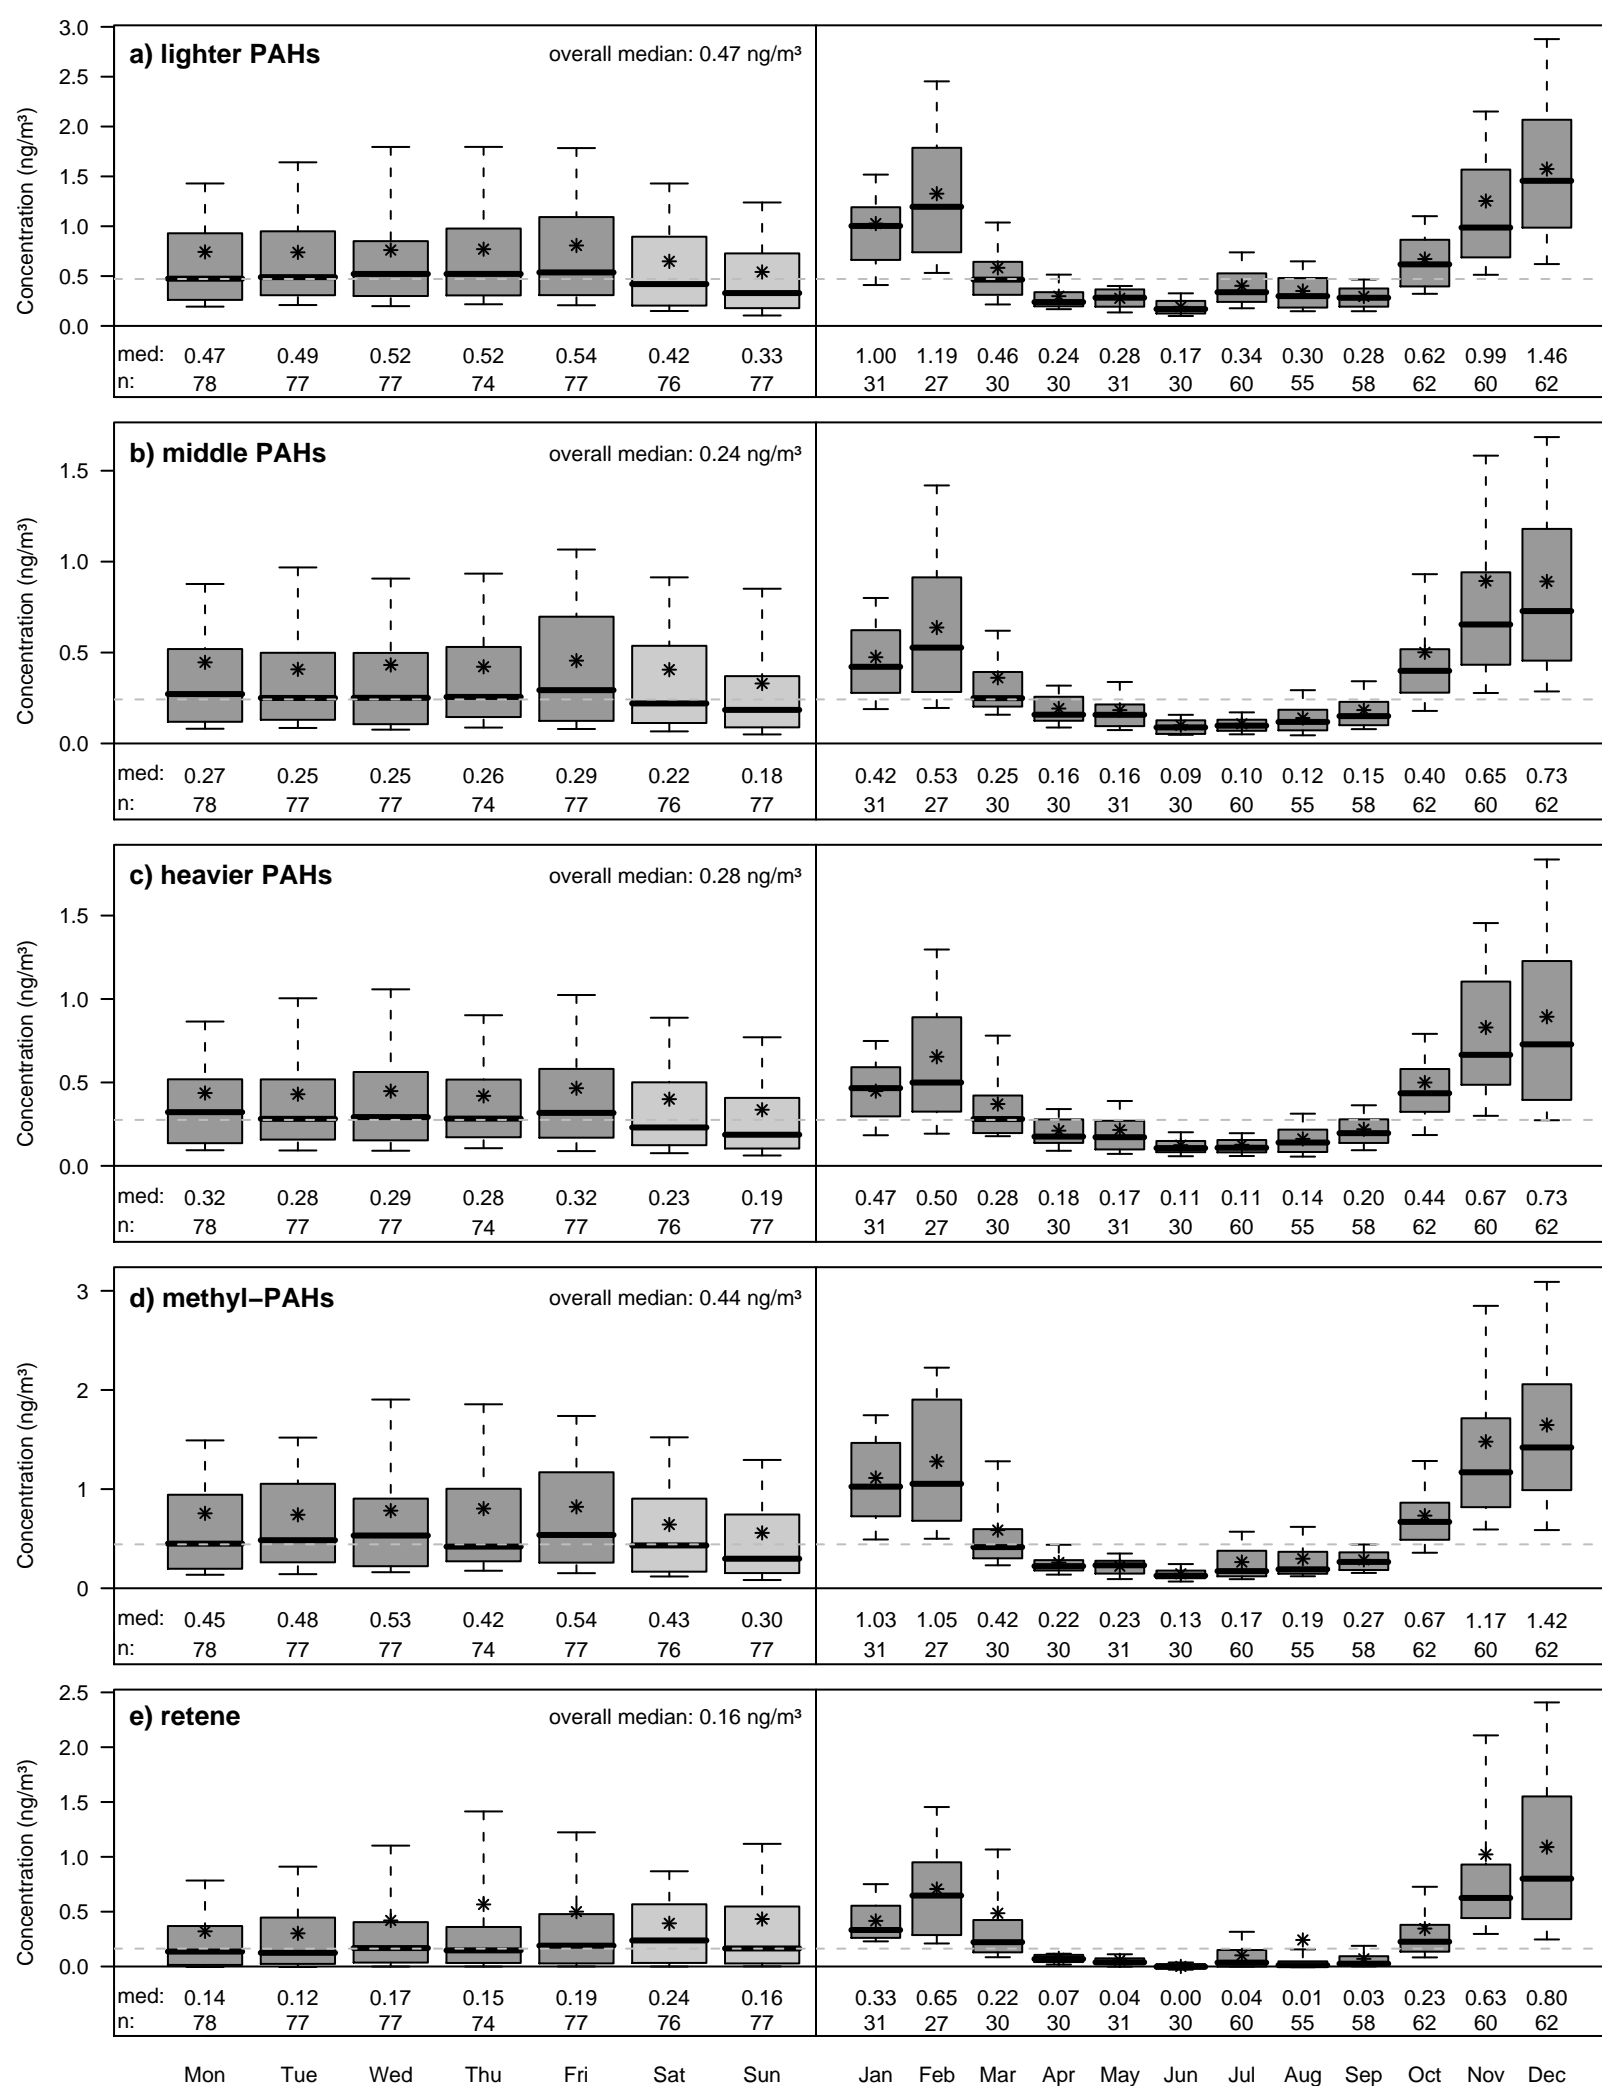

Supplement: NIHMS170612-supplement-04.pdf [file NIHMS170612-supplement-04.pdf]

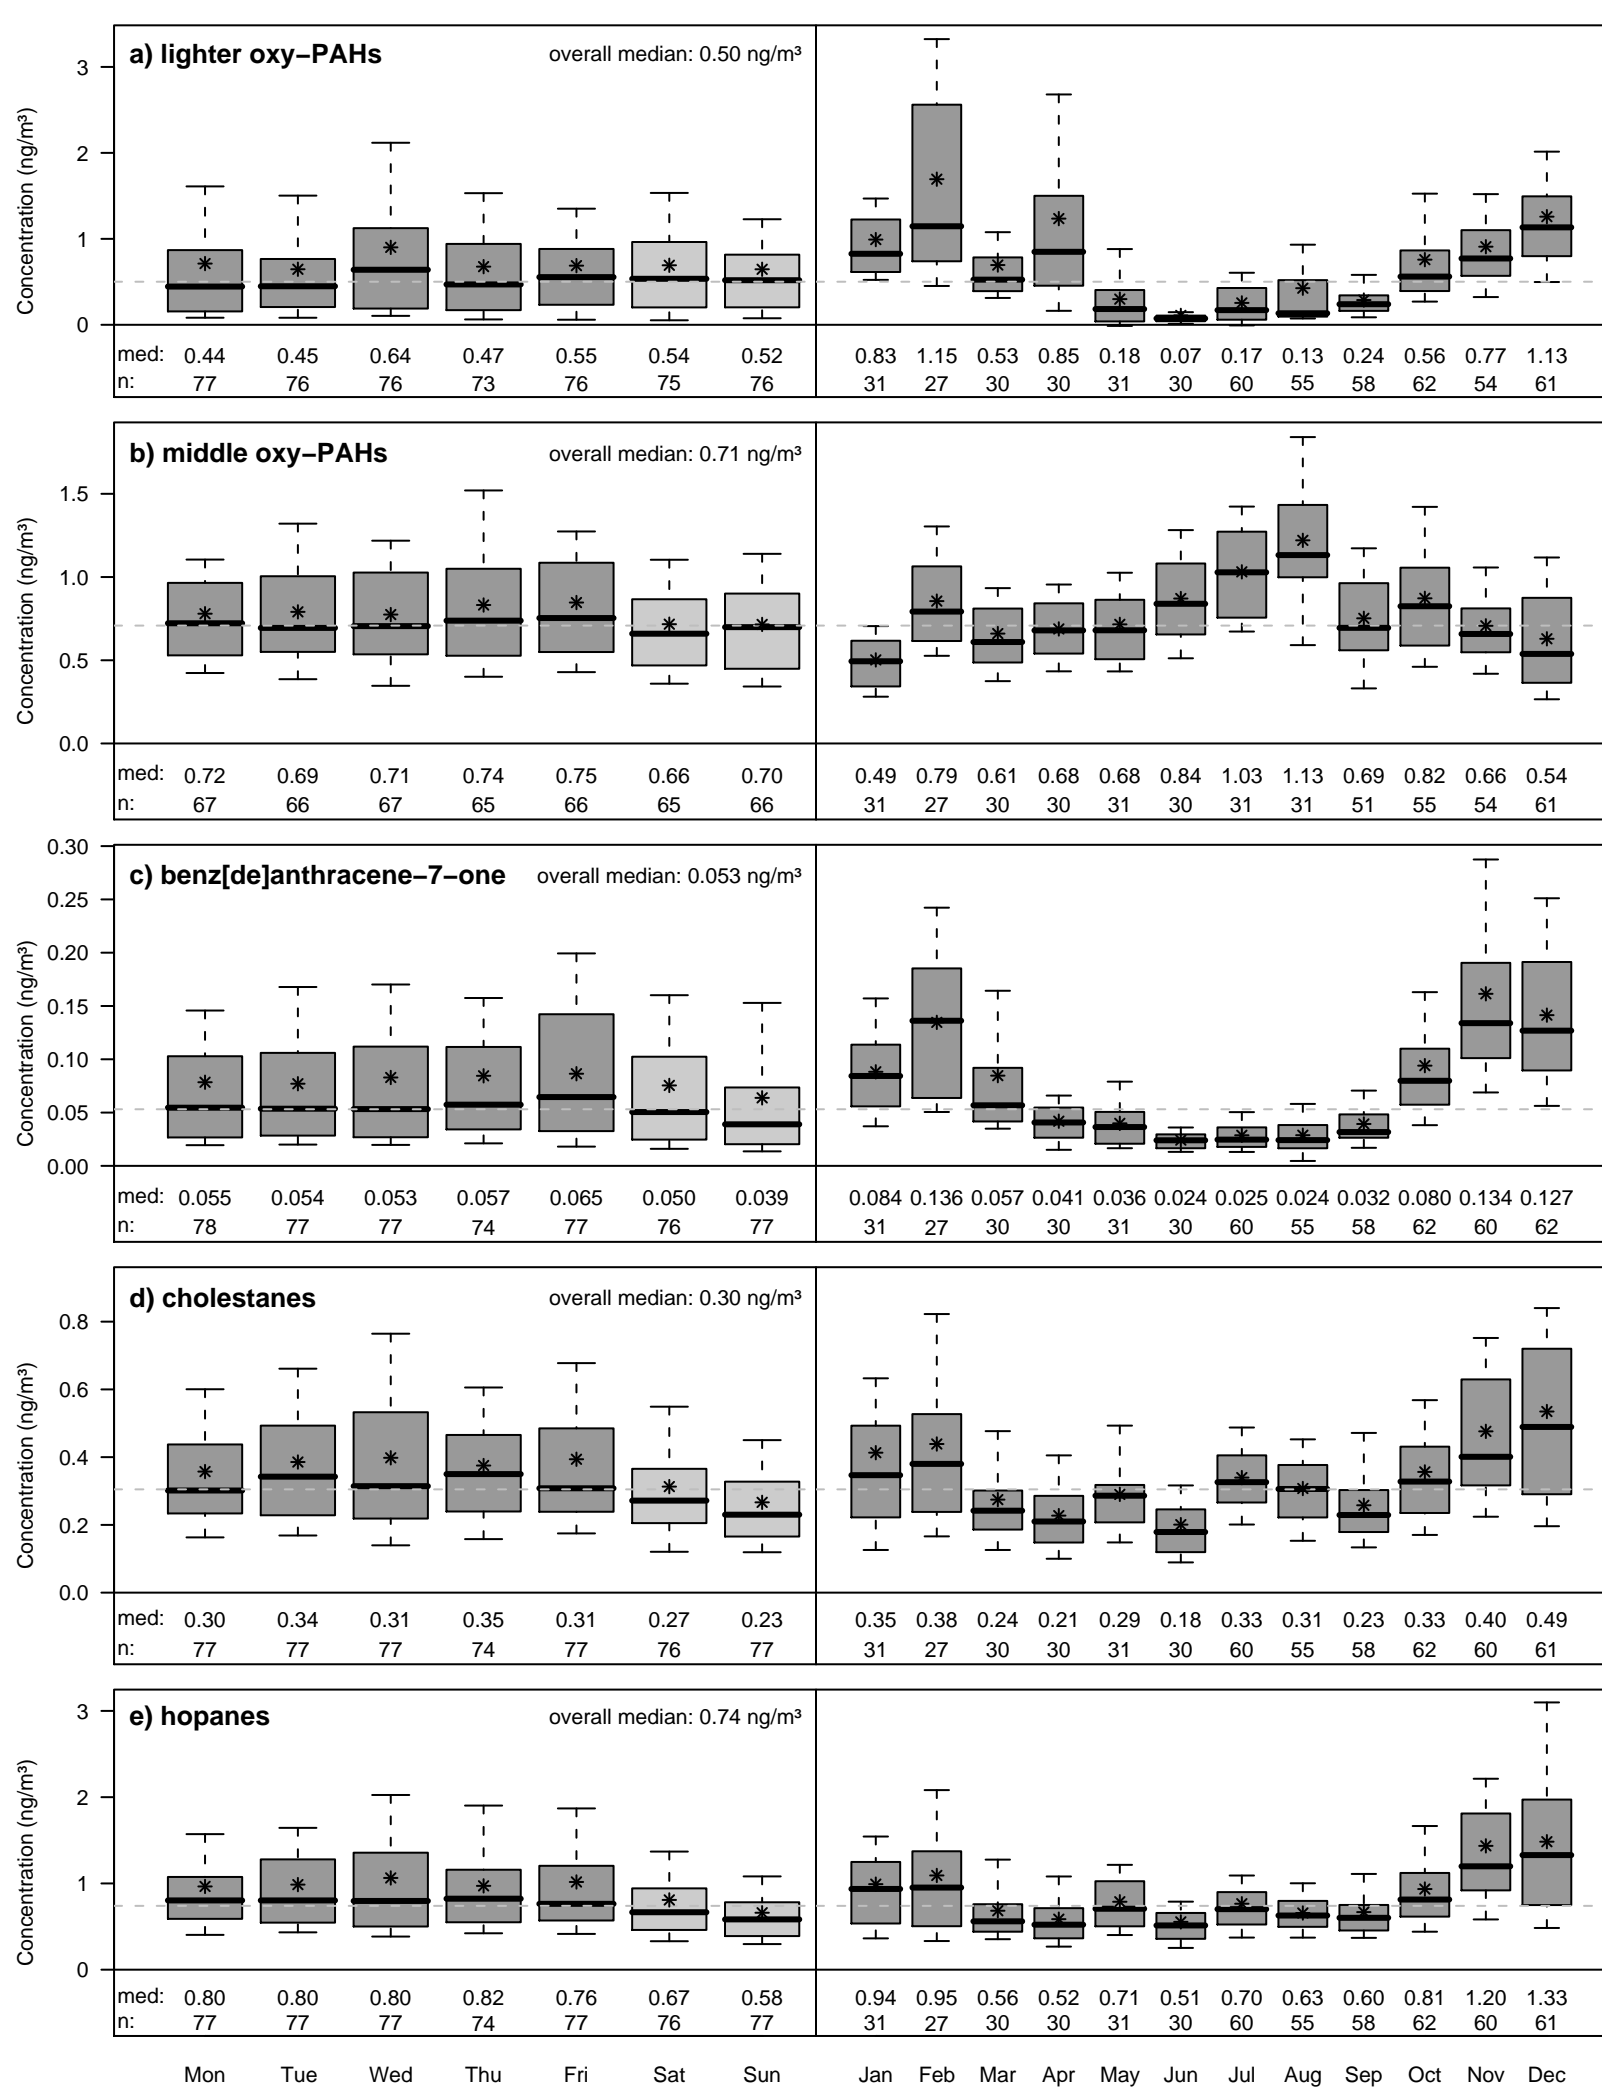

Supplement: NIHMS170612-supplement-05.pdf [file NIHMS170612-supplement-05.pdf]

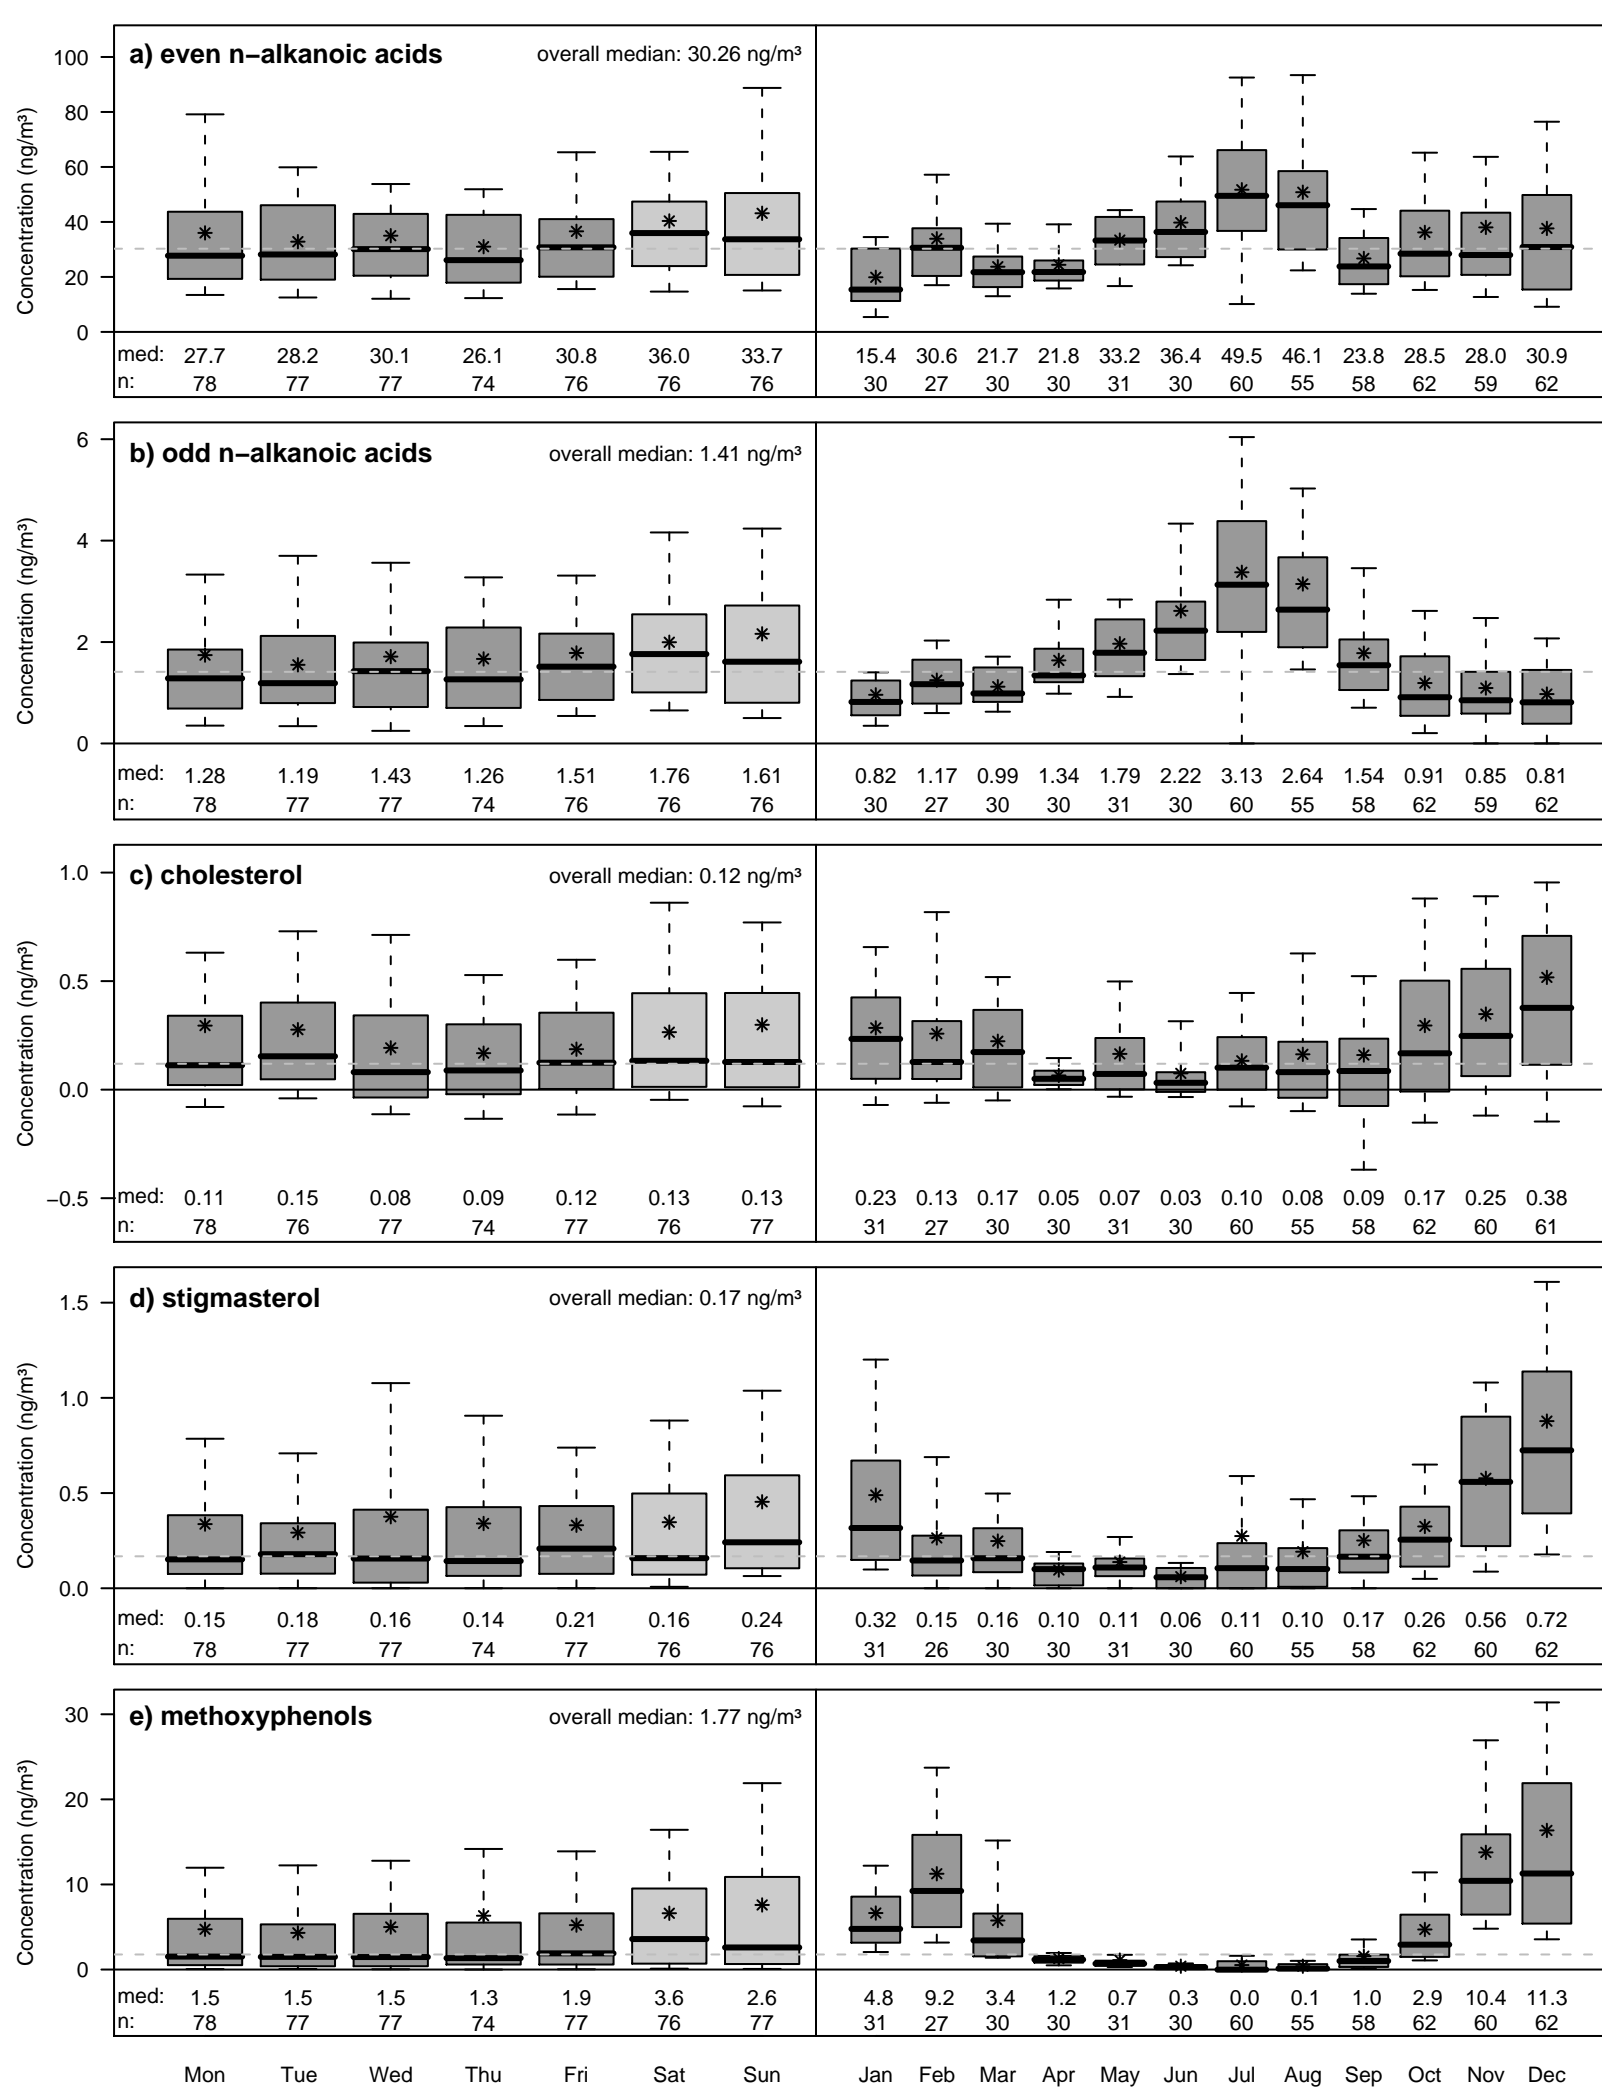

Supplement: NIHMS170612-supplement-06.pdf [file NIHMS170612-supplement-06.pdf]

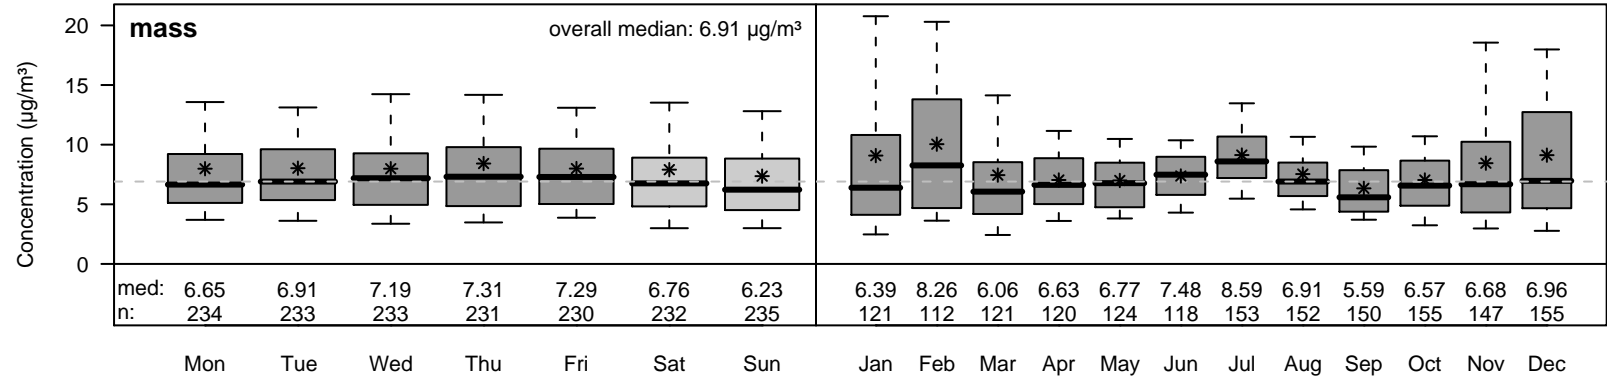

Supplement: NIHMS170612-supplement-07.pdf [file NIHMS170612-supplement-07.pdf]
